# Supplementary material
Source: PubMed Central journal article supplement (PMC4007099)

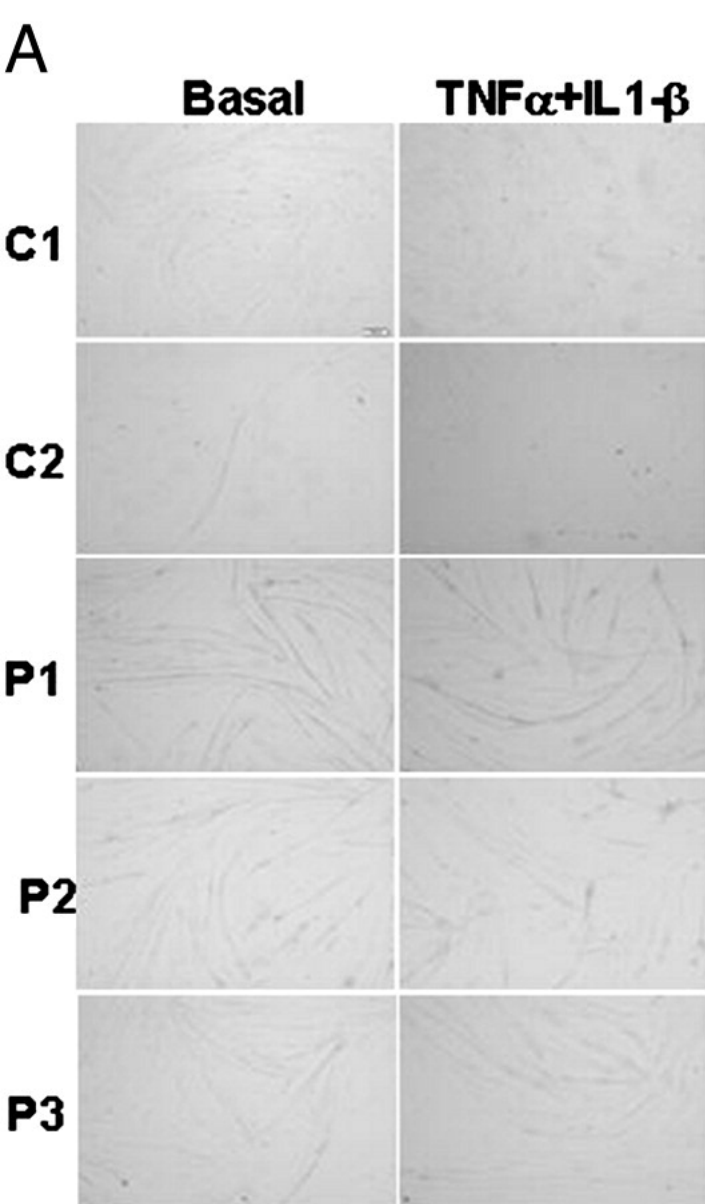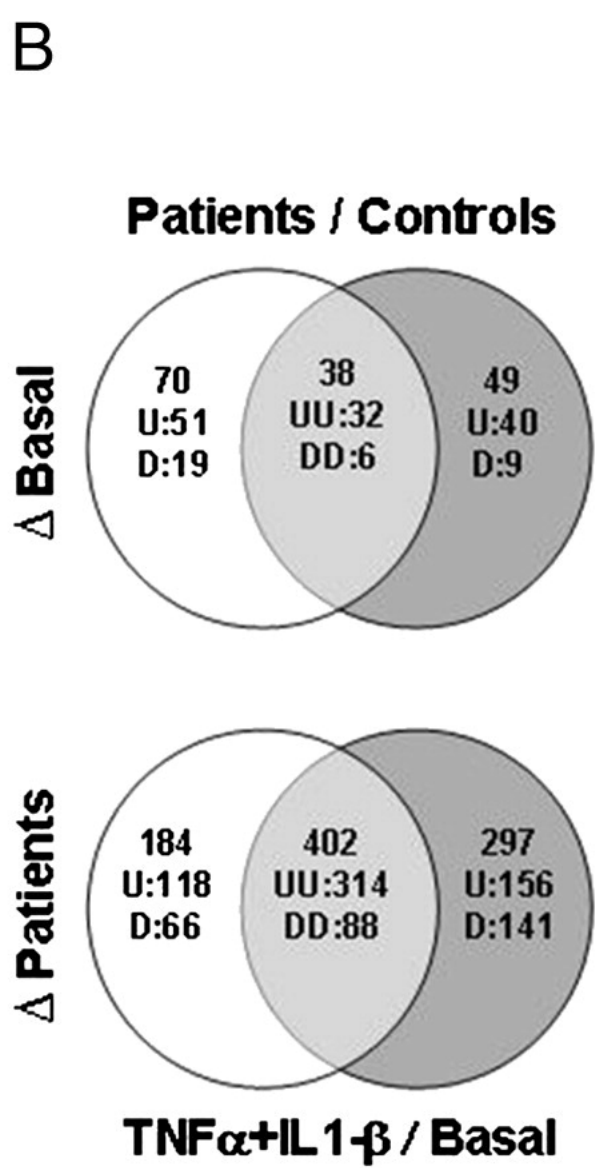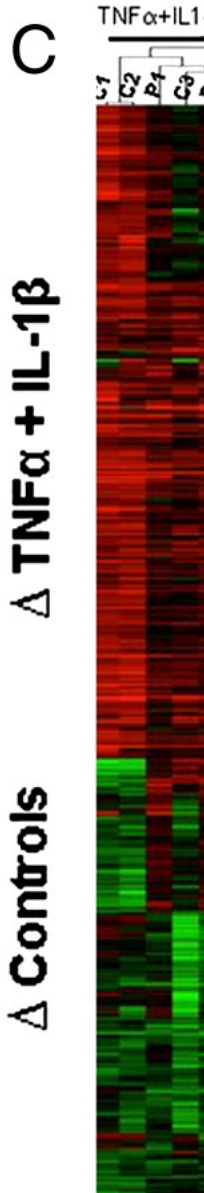

Supplement: NIHMS572255-supplement-Figure_S1.pdf [file NIHMS572255-supplement-Figure_S1.pdf]

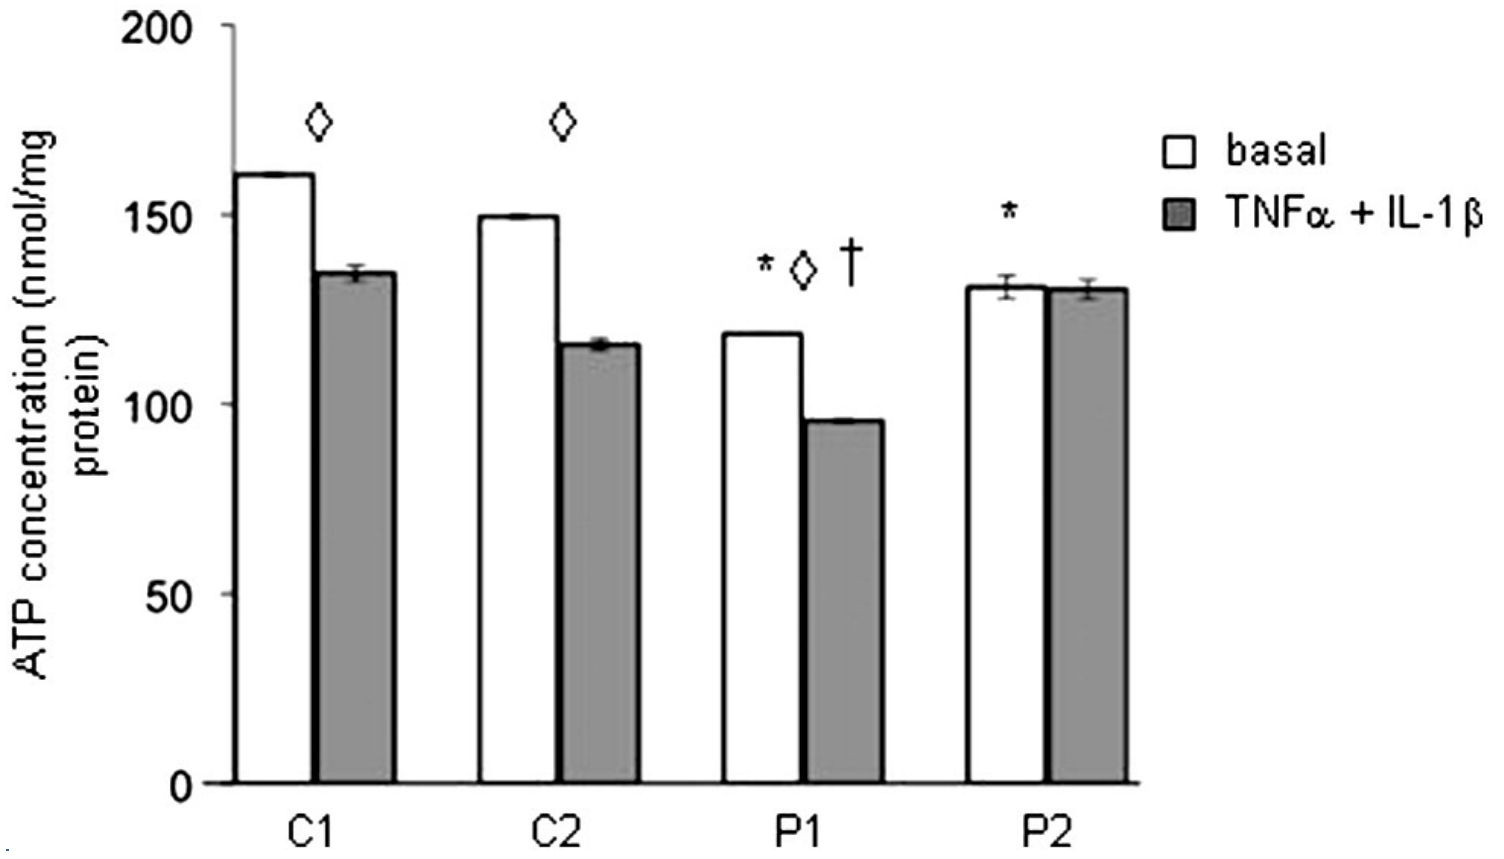

Supplement: NIHMS572255-supplement-Figure_S2.pdf [file NIHMS572255-supplement-Figure_S2.pdf]
